# Supplementary material for: Virome Analysis of Aconitum carmichaelii Reveals Infection by Eleven Viruses, including Two Potentially New Species
Source: MDPI journal article supplement (doi:10.3390/ijms242115558), 2023-10-25
Supplement: s1 [file s1]

**Table S1** Viral sequences identified by high-throughput sequencing analysis

| Library name | Contig number  | Closest related virus                      | Consensus length (nt) | Total read count | Average coverage | Best match (GenBank accession )               | aa identity (%) | Cover region                     | Genus                   |
|--------------|----------------|--------------------------------------------|-----------------------|------------------|------------------|-----------------------------------------------|-----------------|----------------------------------|-------------------------|
| WD-FZ        | contig_539     | White clover cryptic virus 2 (WCCV2), RNA1 | 2,434                 | 29,310           | 1, 809           | White clover cryptic virus 2 RNA1 (NC_021094) | 77              | complete <i>RdRp</i> gene        | <i>Betapartitivirus</i> |
|              | contig_24      | Cannabis cryptic virus (CanCV), RNA2       | 2,244                 | 11,393           | 755              | Cannabis cryptic virus, RNA2 (NC_031130)      | 72              | complete <i>cp</i> gene          |                         |
|              | contig_341     | Currant latent virus (CuLV)                | 6,712                 | 247,068          | 5, 465           | Currant latent virus, RNA1 (NC_029038)        | 75              | complete RNA1 polyprotein gene   | <i>Cheravirus</i>       |
|              | contig_62      |                                            | 2,270                 | 114,114          | 7, 402           | Currant latent virus, RNA2 (KC935375)         | 75              | partial RNA2 polyprotein gene    |                         |
|              | contig_30      | Aconite virus A (AcVA)                     | 5,428                 | 1,166,397        | 31, 210          | Aconite virus A (MN944106)                    | 72              | nearly complete <i>RdRp</i> gene | <i>Carlavirus</i>       |
|              | contig_15, 527 | Cucumber mosaic virus (CMV)                | 3,371                 | 1,810,218        | 75, 124          | Cucumber mosaic virus RNA1 (LC593244)         | 98              | almost complete RNA1             | <i>Cucumovirus</i>      |
|              | contig_61      |                                            | 3,053                 | 699,777          | 30, 895          | Cucumber mosaic virus RNA2 (LC593245)         | 99              | almost complete RNA2             |                         |
|              | contig_82      |                                            | 2,217                 | 3,575,260        | 184, 183         | Cucumber mosaic virus RNA3 (LC593246)         | 98              | almost complete RNA3             |                         |
|              | contig_1317    | Apple stem grooving virus (ASGV)           | 6,509                 | 24,272           | 540              | Apple stem grooving virus (KU947036)          | 97              | almost complete genome           | <i>Capillovirus</i>     |
|              | contig_6, 287  | Tulip breaking virus (TBV)                 | 9,479                 | 2,188,397        | 135, 266         | Tulip breaking virus (MH886517)               | 56              | almost complete genome           | <i>Potyvirus</i>        |
| ZY-FZ        | contig_1, 934  | Cucumber mosaic virus (CMV)                | 2,856                 | 1,975,751        | 89,806           | Cucumber mosaic virus RNA1 (KC527787)         | 99              | almost complete RNA1             | <i>Cucumovirus</i>      |
|              | contig_362     |                                            | 2,963                 | 256,569          | 4,082            | Cucumber mosaic virus RNA2 (KC52769)          | 100             | almost complete RNA2             |                         |
|              | contig_352     |                                            | 2,207                 | 2,568,895        | 107,037          | Cucumber mosaic virus RNA3 (EF216865)         | 98              | almost complete RNA3             |                         |
|              | contig_31      | Chilli veinal mottle virus                 | 7,930                 | 545,473          | 6, 852           | chilli veinal mottle virus isolate            | 98              | nearly complete                  | <i>Potyvirus</i>        |

| isolate (ChiVMV) |                                               |       |           |        | (MT974520)                                                     | genome |                           |                        |
|------------------|-----------------------------------------------|-------|-----------|--------|----------------------------------------------------------------|--------|---------------------------|------------------------|
| contig_5, 396    |                                               | 8,894 | 2,895,365 | 65,803 | tomato spotted wilt<br>orthotospovirus segment L<br>(MF805766) | 99     | almost complete<br>genome |                        |
| contig_8, 094    | Tomato spotted wilt<br>orthotospovirus (TSWV) | 2,985 | 947,758   | 37,910 | tomato spotted wilt<br>orthotospovirus segment S<br>(HQ402595) | 99     | almost complete<br>genome | <i>Orthotospovirus</i> |
| contig_617       |                                               | 4,840 | 589,258   | 13,392 | tomato spotted wilt<br>orthotospovirus segment M<br>(JF960236) | 99     | almost complete<br>genome |                        |
| contig_986       | Tobacco vein distorting<br>virus (TVDV)       | 2,418 | 8,637     | 148    | tobacco vein distorting virus<br>(EF529624)                    | 88     | complete <i>RTD</i> gene  | <i>Polerovirus</i>     |
| contig_943       | Potato leafroll virus<br>(PLRV)               | 2157  | 5,768     | 94     | potato leafroll virus<br>(NC_001747)                           | 88     | partial <i>RTD</i> gene   | <i>Polerovirus</i>     |

**Table S2** Identity of the RNA1 and RNA2 encoded polyproteins between CuLV-YWDi and other cheraviruses

| CuLV-YWDi | CULV       | ALSV       | CRLV       | AVB        | StPV       |
|-----------|------------|------------|------------|------------|------------|
| RNA1      | (KT692952) | (AB030940) | (MK952187) | (MK153131) | (OP328251) |
|           | 75.7%      | 66.4%      | 63%        | 33.8%      | 27.6%      |
| CuLV-YWDi | CuLV       | ALSV       | (MK952188) | AVB        | StPV       |
| RNA2      | (KT692953) | (AB030941) | CRLY       | (MK153132) | (OP328252) |
|           | 74.7%      | 68.7%      | 65.5%      | 22.9%      | 22.6%      |

**Table S3** Primers used for detection the viruses infecting *Aconitum carmichaelii*

| Virus     | Primer name* | Primer sequence (5'-3')   | Size (nt) | Tm (°C) |
|-----------|--------------|---------------------------|-----------|---------|
| AcoPV-1   | FZPoF8659    | TTGAGGCAGATTAGCTCCAAGC    | 532       | 57      |
|           | FZPoR9191    | TATTGCGTAAGGCTGCTGCCTTC   |           |         |
| AcoBPV-1  | WCCV2R2F1464 | ACACAGCTCCAAGCGTTCTTGTC   | 494       | 58      |
|           | WCCV2R1R1931 | TTCGGACATGCCAGGAACAGC     |           |         |
| CuLV-YWDi | CuLVR1F61    | TTCGTTTCCCAACTCTGCTACC    | 665       | 55      |
|           | CuLVR1R725   | AACAACGCCACGTGGCATATCG    |           |         |
| AcoAV-1   | FZAVF1900    | ATGATTCCCAGTGGCTCTCTC     | 1100      | 57      |
|           | FZAVR3000    | TGTAGTCCACGCTGCATATGC     |           |         |
| AcVA      | AcVAF109     | ATATCGTAGCCCACTTGAGG      | 905       | 55      |
|           | AcVAR994     | TGCAAGTTGTGGCTTCGAACC     |           |         |
|           | AcVAF201     | ACTATGCACTTGAGGCTCATG     | 714bp     | 55      |
|           | AcVAR914     | TAACGTGGTGAGCGAATTTGC     |           |         |
| CMV       | CMVCPuF      | TCTCATGGATGCTTCTCCGCG     | 880       | 55      |
|           | CMVCPuR      | CCGTAAGCTGGATGGACAACC     |           |         |
| ASGV      | ASGVF5431    | TCTGGAAGAAGGTGCACCAAACG   | 918       | 56      |
|           | ASGVR6326    | TGCAAGACCGCGACCAAATTTG    |           |         |
| ChiVMV    | ChiVMVdF     | GGATAGAGCTGARCARCCAG      | 920       | 57      |
|           | ChiVMVdR     | CTTTGAAGCCCATATCTTGGC     |           |         |
| TSWV      | TSWVMF1829   | TGATAAGTAGATAGAGAGCAAGC   | 503       | 55      |
|           | TSWVMR2332   | TGAAGTATAGCTCATGGACC      |           |         |
| TVDV      | TVDVdF       | ATGGTGACTCTGAAGGATCCTGC   | 534       | 57      |
|           | TVDVdR       | TGGTCAACATACGCTTCGTCAGTG  |           |         |
| PLRV      | PLRV-CP-F    | ATGAGTACGGTCGTGGTTAAAG    | 600       | 57      |
|           | PLRV-CP-R    | ATGGTGACTCTGAAGGATCCTGC   |           |         |
| AcLV      | AcLVdF       | AGTTCAACGAAGGTCTCAAAGG    | 971       | 54      |
|           | AcLVdR       | TCTCTGGTTAATTCAGGTCCATTGC |           |         |

\* F: Forward primer; R: Reverse primer; primers of AcVAF201 and AcVAR914 were used to detection AcVA in *A. carmichaelii* seedlings.

**Table S4** Single or mixed viral-infection rates in *Aconitum carmichaelii* detected by RT-PCR

| Viral viruses | Numbers of virus-positive sample | Detection rate (%) |
|---------------|----------------------------------|--------------------|
| 1 virus       | 9                                | 6.3                |
| 2 viruses     | 19                               | 13.4               |
| 3 viruses     | 34                               | 23.9               |
| 4 viruses     | 40                               | 28.2               |
| 5 viruses     | 22                               | 15.5               |
| 6 viruses     | 6                                | 4.2                |
| 7 viruses     | 2                                | 1.4                |
| No virus      | 10                               | 7.0                |
| Total         | 142                              |                    |

Note: A total of 132 in 142 samples were virus-positive

**Table S5** Viruses involved in single or mixed infection in *Aconitum carmichaelii*

| order | viruses   | Single or mixed viral-infection types | Positive numbers | Detection rate (%) |
|-------|-----------|---------------------------------------|------------------|--------------------|
| 1     | 1 virus   | AcoPV-1                               | 4                | 2.8                |
| 2     | 1 virus   | CuLV                                  | 2                | 1.4                |
| 3     | 1 virus   | CMV                                   | 1                | 0.7                |
| 4     | 1 virus   | TSWV                                  | 1                | 0.7                |
| 5     | 1 virus   | TVDV                                  | 1                | 0.7                |
| 6     | 2 viruses | AcoPV-1+CMV                           | 8                | 5.6                |
| 7     | 2 viruses | ACVA+CMV                              | 6                | 4.2                |
| 8     | 2 viruses | AcoAV-1+CMV                           | 2                | 1.4                |
| 9     | 2 viruses | CuLV +CMV                             | 1                | 0.7                |
| 10    | 2 viruses | ACVA+ASGV                             | 1                | 0.7                |
| 11    | 2 viruses | AcoPV-1+TVDV                          | 1                | 0.7                |
| 12    | 3 viruses | AcoPV-1+ACVA+CMV                      | 12               | 8.5                |
| 13    | 3 viruses | AcoAV-1+ACVA+CMV                      | 7                | 4.9                |
| 14    | 3 viruses | AcoBPV-1+ACVA+CMV                     | 4                | 2.8                |
| 15    | 3 viruses | AcoPV-1+CMV+TVDV                      | 2                | 1.4                |
| 16    | 3 viruses | AcoPV-1+AcoAV-1+CMV                   | 2                | 1.4                |
| 17    | 3 viruses | CuLV +ACVA+CMV                        | 2                | 1.4                |
| 18    | 3 viruses | AcoPV-1+TSWV+TVDV                     | 1                | 0.7                |
| 19    | 3 viruses | AcoPV-1+CMV+TSWV                      | 1                | 0.7                |
| 20    | 3 viruses | AcoAV-1+CMV+ChiVMV                    | 1                | 0.7                |
| 21    | 3 viruses | AcoBPV-1+CuLV +AcoAV-1                | 1                | 0.7                |
| 22    | 3 viruses | AcoPV-1+AcoAV-1+ACVA                  | 1                | 0.7                |
| 23    | 4 viruses | AcoPV-1+AcoBPV-1+ACVA+CMV             | 8                | 5.6                |
| 24    | 4 viruses | AcoPV-1+AcoAV-1+ACVA+CMV              | 8                | 5.6                |
| 25    | 4 viruses | AcoPV-1+CuLV +ACVA+CMV                | 7                | 4.9                |
| 26    | 4 viruses | AcoPV-1+ACVA+CMV+ASGV                 | 4                | 2.8                |
| 27    | 4 viruses | AcoBPV-1+AcoAV-1+ACVA+CMV             | 3                | 2.1                |

|       |           |                                               |     |     |
|-------|-----------|-----------------------------------------------|-----|-----|
| 28    | 4 viruses | AcoBPV-1+ACVA+CMV+ASGV                        | 2   | 1.4 |
| 29    | 4 viruses | CuLV +ACVA+CMV+ASGV                           | 2   | 1.4 |
| 30    | 4 viruses | AcoPV-1+CMV+TVDV+PLRV                         | 1   | 0.7 |
| 31    | 4 viruses | AcoPV-1+AcoBPV-1+TSWV+TVDV                    | 1   | 0.7 |
| 32    | 4 viruses | CuLV +AcoAV-1+ACVA+CMV                        | 1   | 0.7 |
| 33    | 4 viruses | AcoPV-1+AcoAV-1+ACVA+ASGV                     | 1   | 0.7 |
| 34    | 4 viruses | AcoBPV-1+CuLV +ACVA+CMV                       | 2   | 1.4 |
| 35    | 5 viruses | AcoPV-1+AcoBPV-1+AcoAV-1+ACVA+CMV             | 5   | 3.5 |
| 36    | 5 viruses | AcoPV-1+CuLV +AcoAV-1+ACVA+CMV                | 3   | 2.1 |
| 37    | 5 viruses | AcoPV-1+CuLV +ACVA+CMV+ASGV                   | 3   | 2.1 |
| 38    | 5 viruses | AcoPV-1+AcoAV-1+ACVA+CMV+ASGV                 | 3   | 2.1 |
| 39    | 5 viruses | AcoPV-1+AcoBPV-1+CuLV +ACVA+CMV               | 2   | 1.4 |
| 40    | 5 viruses | AcoBPV-1+CuLV +ACVA+CMV+ASGV                  | 2   | 1.4 |
| 41    | 5 viruses | AcoPV-1+AcoAV-1+CMV+TSWV+PLRV                 | 1   | 0.7 |
| 42    | 5 viruses | AcoPV-1+AcoBPV-1+ACVA+CMV+ASGV                | 1   | 0.7 |
| 43    | 5 viruses | AcoPV-1+AcoAV-1+ACVA+CMV+ChiVMV               | 1   | 0.7 |
| 44    | 5 viruses | CuLV +AcoAV-1+ACVA+CMV+ChiVMV                 | 1   | 0.7 |
| 45    | 6 viruses | AcoPV-1+AcoBPV-1+CuLV +ACVA+CMV+ASGV          | 3   | 2.1 |
| 46    | 6 viruses | AcoPV-1+AcoBPV-1+CuLV +AcoAV-1+ACVA+ CMV      | 1   | 0.7 |
| 47    | 6 viruses | AcoPV-1+CuLV +AcoAV-1+ACVA+CMV+ASGV           | 1   | 0.7 |
| 48    | 6 viruses | AcoBPV-1+CuLV +AcoAV-1+ACVA+ CMV+ASGV         | 1   | 0.7 |
| 49    | 7 viruses | AcoPV-1+AcoBPV-1+ CuLV +AcoAV-1+AcVA+CMV+ASGV | 2   | 1.4 |
|       | No virus  |                                               | 10  | 7.0 |
| total |           |                                               | 142 |     |

**Table S6** Primers used for amplification of the complete nucleotide sequence of AcoPV-1

| Primer name*   | Primer sequence (5'-3')   | Size (nt) | T <sub>m</sub> (°C) | Note       |
|----------------|---------------------------|-----------|---------------------|------------|
| PotyvirusF98   | AAGCACACATAAGCACAATGGCG   | 1603      | 58                  |            |
| PotyvirusR1701 | ACATTCGGATTTCTCCTGATTACG  |           |                     |            |
| PotyvirusF1588 | TTCAAATGGCGCCAGCGCGC      |           |                     |            |
| PotyvirusR3167 | AGCTGCAACAAGACACACATCAC   | 1579      | 58                  |            |
| PotyvirusF3099 | AAGAAGCGCAATGGCAGATCTC    |           |                     |            |
| PotyvirusR4555 | TTCAGGCCAAAATCAACAACCGC   |           |                     |            |
| PotyvirusF4442 | GATACCAACAAGTGGAATCAC     | 1544      | 58                  |            |
| PotyvirusR5986 | TTACTGAGTCGATGTCCAGCTC    |           |                     |            |
| PotyvirusF5845 | ACTTTTGACGGTATGTGATCC     |           |                     |            |
| PotyvirusR7459 | TCATTGAGCCATTCCACACTCC    | 1614      | 58                  |            |
| PotyvirusF7305 | AGCATTGAATATGAAGGCAGCAGTC |           |                     |            |
| PotyvirusR8772 | ATCCTACTGTGCATGTGTTGCTC   |           |                     |            |
| PotyvirusF8659 | TTGAGGCAGATTAGCTCCAAGC    | 532       | 58                  |            |
| PotyvirusR9191 | TATTGCGTAAGGCTGCTGCCTTC   |           |                     |            |
| PotyvirusF8971 | AATGCACAACCCACACTAAGGC    |           |                     |            |
|                |                           | ~540      | 58                  | For 3'-end |

|               |                                        |      |    |        |
|---------------|----------------------------------------|------|----|--------|
| Vial9 (PCR)   | GACCACGCGTATCGATGTCGAC                 |      |    |        |
| Vial8 (RT)    | GACCACGCGTATCGATGTCGACTTTTTTTTTTTTTTTT |      |    |        |
|               | V (V = A, C or G)                      |      |    |        |
| PotyvirusR224 | ATGTTGGATTTCGTAGTTGGCAATAGC            | ~220 | 65 | For 5' |
| PotyvirusR386 | TTCTTGAGAGCCGCATCCTGGGCCTC             | ~380 | 60 | RACE   |

\* F: Forward primer; R: Reverse primer

**Table S7** Primers used for amplification of the complete nucleotide sequence of CuLV-YWDi

| Primer name*      | Primer sequence (5'-3')                                    | Size (nt) | Tm (°C) | Segment | Note        |
|-------------------|------------------------------------------------------------|-----------|---------|---------|-------------|
| CheravirusR1R191  | ACATGTGTCCTCTGGAGAGGAG                                     | ~190      | 58      |         |             |
| CheravirusR1R232  | ATACGCATTGACCTCTGGAGAGAGGC                                 | ~220      | 62      |         | For 5' RACE |
| CheravirusR1F61   | TTCGTTTCCCAACTCTGCTACC                                     |           |         |         |             |
| CheravirusR1R725  | AACAACGCCACGTGGCATATCG                                     | 660       | 58      |         |             |
| CheravirusR1F550  | ATCAACGCAGACAGGCTCTGC                                      |           |         |         |             |
| CheravirusR1R2033 | AAGGCATCCATCCAGCTAACC                                      | 1471      | 58      |         |             |
| CheravirusR1F1901 | AGGTGCAAAAAGAAACGGTTGTGC                                   | 1592      | 58      |         |             |
| CheravirusR1R3493 | AACATATACAGGGCAAACCTTGATC                                  |           |         |         |             |
| CheravirusR1F3320 | TGCATCATTTCCCTCAATTCGAGGC                                  | 1729      | 58      | RNA1    |             |
| CheravirusR1R5031 | ATGTGCCAATCTCCAGGAGATCC                                    |           |         |         |             |
| CheravirusR1F4798 | ATGCTGAGTCGCTAGTTATGCAG                                    |           |         |         |             |
| CheravirusR1R6334 | TGTGAGACCACCCAATCTGTAG                                     | 1537      | 58      |         |             |
| Vial9 (PCR)       | GACCACGCGTATCGATGTCGAC                                     |           |         |         |             |
| Vial8 (RT)        | GACCACGCGTATCGATGTCGACTTTT<br>TTTTTTTTTTTV (V = A, C or G) | ~400      | 56      |         | For 3'-end  |
| CheravirusR1F6179 | TGGTCTCTATGCAGTTTAAAGCTCG                                  |           |         |         |             |
| CheravirusR2R178  | ACAGGATTCAACCAACCGCTGGTGGC                                 | ~200      |         |         | For 5' RACE |
| CheravirusR2F150  | ACTTCCCTCCCTTCTTCTAAC                                      |           |         |         |             |
| CheravirusR2R480  | TCATCTTTGGCCAAGTAGGTGG                                     | 330       | 54      |         |             |
| CheravirusR1F362  | AATGCTGGCACGTCTCCGTGC                                      |           |         |         |             |
| CheravirusR1R2012 | AGACGGTGTCCCATTCTACTAGC                                    | 1652      | 58      |         |             |
| CheravirusR2F1846 | TCTACACCTTCCCTTCAATAGTTG                                   |           |         |         |             |
| CheravirusR2R3120 | ATGATTAGCACGGACCCAAAGTTG                                   | 1274      | 58      | RNA2    |             |
| CheravirusR2F2767 | ATGTGGTTGCGCACCTATCGAGTTGC                                 |           |         |         |             |
| Vial9 (PCR)       | GACCACGCGTATCGATGTCGAC                                     |           |         |         |             |
| Vial8 (RT)        | GACCACGCGTATCGATGTCGACTTTT<br>TTTTTTTTTTTV (V = A, C or G) | ~400      | 60      |         | For 3'-end  |

\* F: Forward primer; R: Reverse primer

**Table S8** Primers used for amplification of the complete nucleotide sequence of AcoBPV-1

| Primer name*            | Primer sequence (5'-3')                                     | Size (nt) | Tm (°C) | Segment | Note        |
|-------------------------|-------------------------------------------------------------|-----------|---------|---------|-------------|
| BetapartitivirusR1R200  | AGTAGAATCAAGAACAGCAGTGGGATCAC                               | ~200      | 62      |         | For 5' RACE |
| BetapartitivirusR1F23   | ACATTCGTCTCCAGTATCAAGC                                      | 2072      | 58      |         |             |
| BetapartitivirusR1R2094 | TTGCTAGATCAGGCATTCCATC                                      |           |         |         |             |
| Vial9 (PCR)             | GACCACGCGTATCGATGTCGAC                                      |           |         | RNA1    |             |
| Vial8 (RT)              | GACCACGCGTATCGATGTCGACTTTTTTTTTT<br>TTTTTTV (V = A, C or G) |           |         |         | For 3'-end  |
| BetapartitivirusR1F2007 | TCTCACTATAAACCAGACGTTTCGC                                   | ~400      | 60      |         |             |
| BetapartitivirusR2R233  | TGAAGAATCAGTACGAGCAGCAGTATTGG                               | ~250      | 62      |         | For 5' RACE |
| BetapartitivirusR2F80   | TCTAACGATGTCTACCTCATCTAC                                    | 1852      | 58      |         |             |
| BetapartitivirusR1R1931 | TTCGGACATGCCAGGAACAGC                                       |           |         |         |             |
| BetapartitivirusR2F1815 | ATGACTCCAATCACTCCTGTGAATG                                   |           |         | RNA2    |             |
| Vial9 (PCR)             | GACCACGCGTATCGATGTCGAC                                      | ~400      | 56      |         | For 3'-end  |
| Vial8 (RT)              | GACCACGCGTATCGATGTCGACTTTTTTTTTT<br>TTTTTTV (V = A, C or G) |           |         |         |             |

\* F: Forward primer; R: Reverse primer

**Table S9** Primers used for amplification of the complete nucleotide sequence of AcVA-YWDi

| Primer name* | Primer sequence (5'-3')                                 | Size (nt) | Tm (°C) | Note        |
|--------------|---------------------------------------------------------|-----------|---------|-------------|
| AcVAR148     | TACCTATCGACGGCTGTGGCAGAG                                | ~150      | 62      | For 5' RACE |
| AcVAF27      | AGATAAGAGCTGAACATACACGAC                                | 1543      | 58      |             |
| AcVAR1569    | AGCAATGTGACTTCACTAGCAGC                                 |           |         |             |
| AcVAF1462    | TACTGCTGGGACAAGCTATGGC                                  | 1504      | 58      |             |
| AcVAR2965    | TACATCTATCCTCACAAAGCTCTC                                |           |         |             |
| AcVAF2851    | ACCTAGTGCTGTGCCTATGGAC                                  | 1524      | 58      |             |
| AcVAR4374    | TCAGCACTACAACCAGTGAGCTC                                 |           |         |             |
| AcVAF4257    | ATTATTGGCCGACTGCCGTGC                                   | 1413      | 58      |             |
| AcVAR5670    | AGGAAAGTGAACAACATATTGGCC                                |           |         |             |
| AcVAF5410    | TGTCGCTTTGCACCTTACATGC                                  | 1461      | 58      |             |
| AcVAR6871    | AGGTCACAAGAGTTACCACGTC                                  |           |         |             |
| AcVAF6785    | ATTACGTAAGCACTGCGTGCC                                   | 1482      | 58      |             |
| AcVAR8267    | ATTCAAACACGTCGAAAGCAGC                                  |           |         |             |
| AcVAF7900    | ACAACTTGCGAGGCGACACCAC                                  |           |         |             |
| Vial9 (PCR)  | GACCACGCGTATCGATGTCGAC                                  | ~950      | 58      | For 3'-end  |
| Vial8 (RT)   | GACCACGCGTATCGATGTCGACTTTTTTTTTTTTTT<br>(V = A, C or G) |           |         |             |

\* F: Forward primer; R: Reverse primer
